# Supplementary material
Source: PubMed Central journal article supplement (PMC5777887)
Supplement: NIHMS902451-supplement-Supp_FigS1.pdf [file NIHMS902451-supplement-Supp_FigS1.pdf]

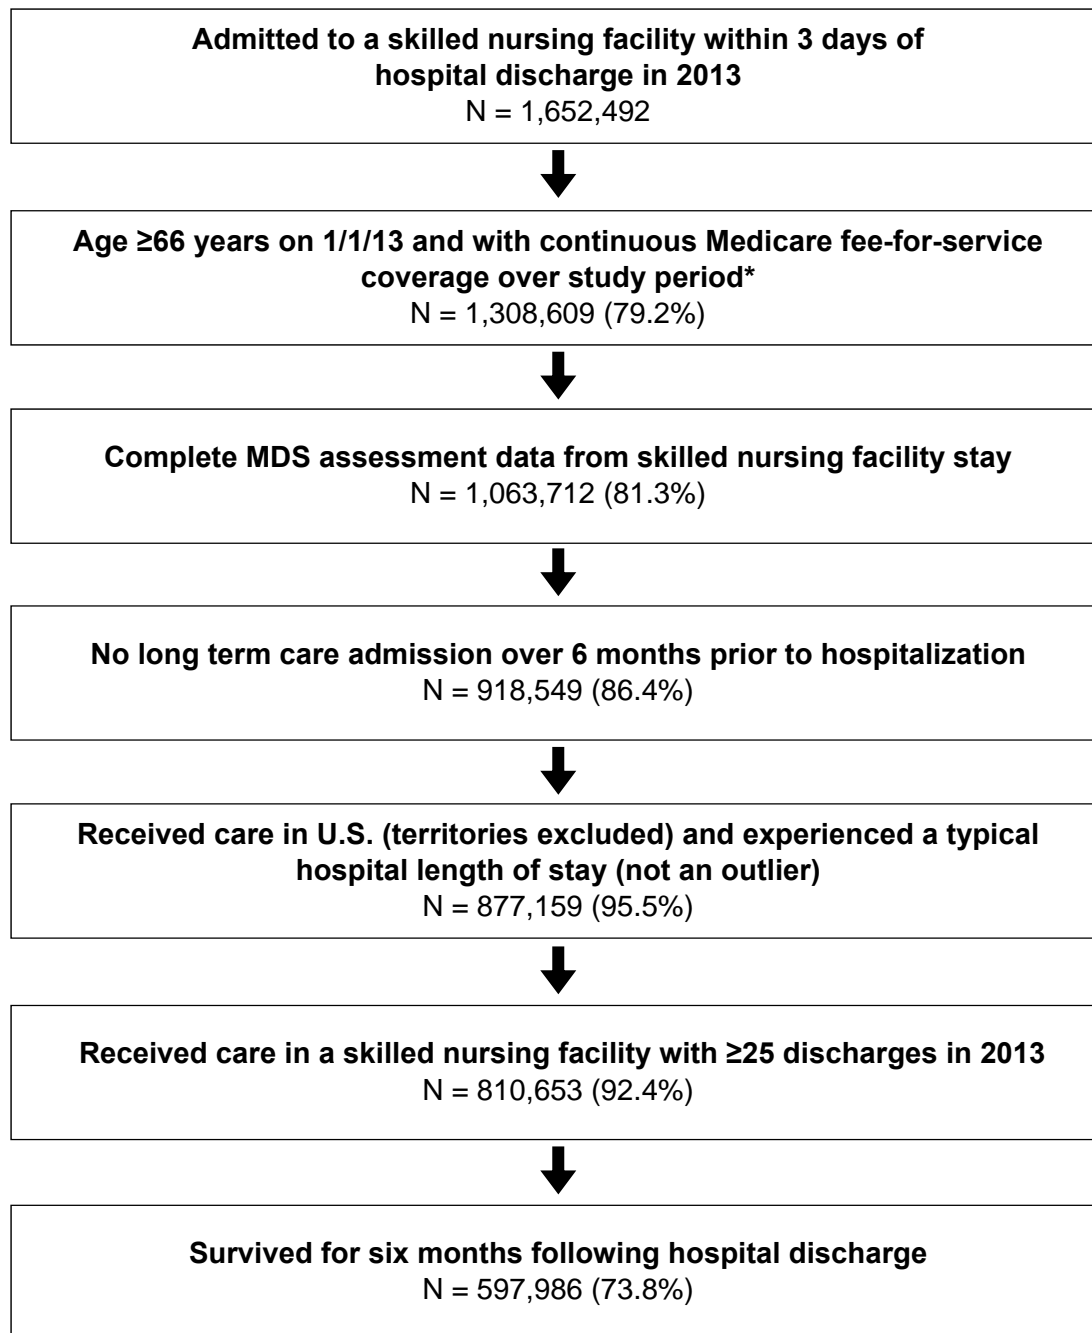

**Supplementary Figure S1.** Flow chart presenting number of eligible cases remaining at each step as exclusion criteria applied. Percentages are percent remaining from the previous step. \* 'Study period' refers to the 12 months prior to and 6 months following hospitalization for each individual.
